# Supplementary material for: Mitigation in the toxicity of graphene oxide nanosheets towards Escherichia coli in the presence of humic acid
Source: Royal Society of Chemistry journal article supplement (doi:10.1039/c6em00256k), 2016-01-01
Supplement: c6em00256k1.pdf [file c6em00256k1.pdf]

## Supplementary information

### Mitigation in antibacterial activity of graphene oxide nanosheets towards *Escherichia coli* in the presence of humic acid

Xuan Zhang,<sup>†</sup> Minghao Sui,<sup>†\*</sup> Xin Yan,<sup>†</sup> Tiandi Huang<sup>†</sup>

<sup>†</sup> State Key Laboratory of Pollution Control and Resource Reuse, College of Environmental Science and Engineering, Tongji University, 1239 Siping Road, Shanghai 200092, People's Republic of China.

\*Corresponding author phone: +86 21 65982691; email: suiminghaostu@126.com

#### Table of Content

|         |                                                                                                                                                  |    |
|---------|--------------------------------------------------------------------------------------------------------------------------------------------------|----|
| Fig. S1 | The surface morphology of GO nanosheets was characterized by transmission electron microscope (TEM) (JEM 2011, Japan).                           | S1 |
| Fig. S2 | The surface functional groups of GO nanosheets were determined by X-ray photoelectron spectroscopy (XPS) (PerkinElmer PHI 5000C ESCA/SAM, U.S.). | S2 |
| Fig. S3 | The diffraction peak of GO nanosheets was confirmed by X-ray diffraction (XRD) (Bruker D8 Advance X, Germany).                                   | S2 |
| Tab. S1 | The minimum inhibitory concentration (MIC) of GO nanosheets towards <i>E. coli</i> was studied.                                                  | S2 |
| Fig. S4 | The minimum bactericidal concentration (MBC) of GO nanosheets towards <i>E. coli</i> was investigated.                                           | S3 |

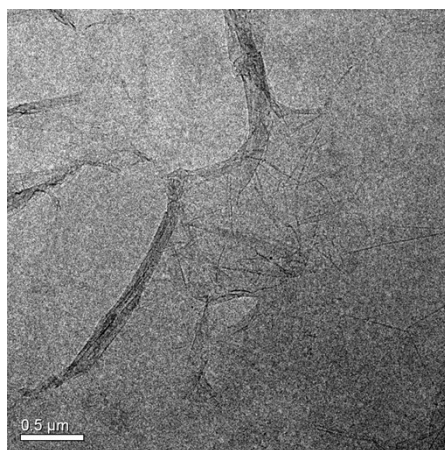

Fig. S1 TEM images of GO nanosheets.

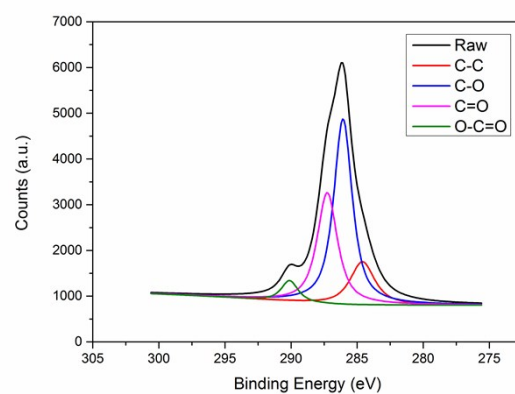

Fig. S2 C1s XPS spectra of GO nanosheets.

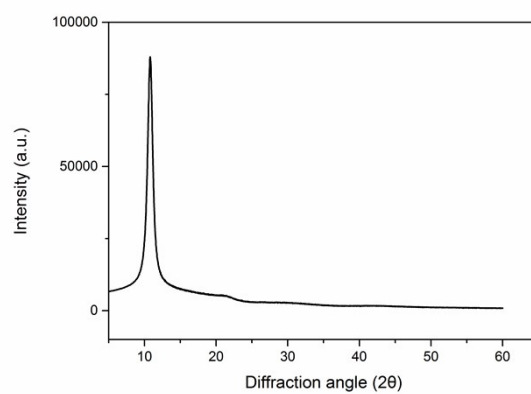

Fig. S3 X-ray diffraction pattern of GO nanosheets.

Tab. S1 The minimum inhibitory concentration (MIC) of GO nanosheets against *E. coli*

| Bacterial<br>type | Concentration of GO nanosheets (mg/L) |     |     |     |      |       |      |     |   |
|-------------------|---------------------------------------|-----|-----|-----|------|-------|------|-----|---|
|                   | 1000                                  | 500 | 250 | 125 | 62.5 | 31.25 | 15.6 | 7.8 | 0 |
| <i>E. coli</i>    | -                                     | -   | -   | -   | -    | +     | +    | +   | + |

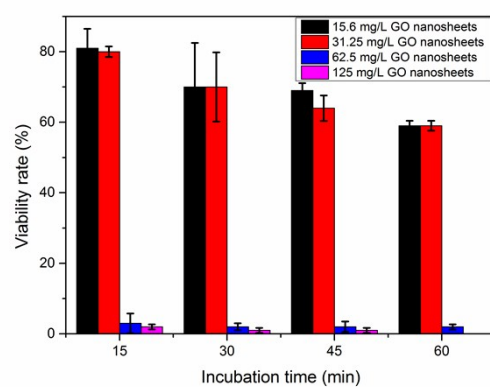

Fig. S4 The minimum bactericidal concentration (MBC) of GO nanosheets towards *E. coli*
